# Supplementary material
Source: MDPI journal article supplement (https://www.mdpi.com/2306-5729/3/4/51)
Supplement: s1 [file s1]

## Sheet: Data
Paper Id	Paper Reference Number	Paper Descriptors									Geographical								Liveability Rankings				Measurement tools and methods						Focus areas covered in paper								Contributors to City Liveability							Recommendations of paper
		Author(s)	First APA In-text Reference	Subsequent In-text Ref.	APA End-Text Reference	Year	Title of Paper	Journal Title	Volume(Issue), Pages	Type of Paper/Report	Australia, International or Global	Country	Region	City/Town	Type of Space(s)	Name of Space(s)	Popn. Density	Climate	EIU 2015	Mercer 2016	EIU 2018	Mercer 2018	Proposed new tool	GIS	Qualitative	Quantitative	No. of Study Participants	Other/Comments	Health/wellbeing	Quality POS	Environmental/ Ecological	Planning/Policy	Liveability	Economic	Social	Other/Comments	Easy access to GI/POS	Walkability	Tree canopy cover	Green/POS Infrastructure	Quality GI/POS	Biodiversity/ ecological opportunity	Other/Comments	Claim lack of research	Suggestion for further research	Other/Comments
1	16	Ann Van Herzele and Torsten Wiedemann	Van Herzele & Wiedemann, 2003	Van Herzele & Wiedemann, 2003	Van Herzele, A. and Wiedemann, T. (2003). A monitoring tool for the provision of accessible and attractive urban green spaces. Landscape and Urban Planning, 63(2), 109-126.	2003	A monitoring tool for the provision of accessible and attractive urban green spaces	Landscape and Urban Planning	63(2), 109–126	3	2	Belgium	Flanders	Antwerp, Ghent, Aalst and Kortrijk	5	Not Specified	2432	T	NR	NR	NR	NR	1	1	1	1	NA	NA	1	1	0	1	1	0	1	NA	1	0	0	0	1	0	NA	1	1	Utilise this tool for improved policy and planning situations.
2	17	K. De Ridder, V. Adamec, A. Bañuelos, M. Bruse, M. Bürger, O. Damsgaard, J. Dufek, J. Hirsch, F. Lefebre, J.M. Pérez-Lacorzana, A. Thierry and C. Weber	De Riddera et al., 2004	De Riddera et al., 2004	De Riddera, K., Adamecb, V., Bañuelosc, A., Brused, M., Bürgerd, M., Damsgaarde, O., Dufekb, J., Hirschf, J., Lefebrea, F., Pérez-Lacorzanac, J. M., Thierrye, A., and Weberf C. (2004). An integrated methodology to assess the benefits of urban green space. Science of the Total Environment, 334-335, 489-497.	2004	An integrated methodology to assess the benefits of urban green space	Science of the Total Environment	334– 335, 489–497	1	2	Europe	Counties of the European Union	Numerous	6	Not Specified	NA	NA	NA	NA	NA	NA	1	1	0	1	NA	NA	1	0	1	0	0	1	1	NA	1	1	0	0	0	1	traffic, emissions, noise and microclimate	1	1	Utilise this tool.
3	18	Emiel de Lange, Emily Woodhouse and E.J. Milner-Gulland	de Lange, Woodhouse & Milner-Gulland, 2015	de Lange et al., 2015	de Lange, E., Woodhouse, E., and Milner‐Gulland, E. J. (2016). Approaches used to evaluate the social impacts of protected areas. Conservation Letters, 9(5), 327-333.	2015	Approaches Used to Evaluate the Social Impacts of Protected Areas	Conservation Letters	9(5), 327–333	2	3	Global	Not Applicable	Not Applicable	6	Not Applicable	NA	NA	NA	NA	NA	NA	0	0	0	0	NA	Review Paper	1	1	1	1	1	1	1	NA	0	0	0	0	0	0	NA	1	1	A more standardised approach/methodology to this area/field of research is required.
4	19	Bo Chen, Ochieng A. Adimo, and Zhiyi Bao	Chen, Adimo & Bao, 2009	Chen et al., 2009	Chen, B., Adimo, O.A., and Bao, Z. (2009). Assessment of aesthetic quality and multiple functions of urban green space from the users’ perspective: The case of Hangzhou Flower Garden, China. Landscape ad Urban Planning, 93(1), 76-82.	2009	Assessment of aesthetic quality and multiple functions of urban green space from the users’ perspective: The case of Hangzhou Flower Garden, China	Landscape and Urban Planning	93(1), 76-82	1	2	China	Zhejiang province in eastern China	Hangzhou - Capital City Metropolitan Area	1	Hangzhou Flower Garden	ND	T	NR	NR	NR	NR	0	0	1	1	178	pictures and survey	0	1	0	0	0	0	1	satisfaction of space	0	0	0	0	1	0	NA	0	0	Need to match attributes of constructed POS with desires/expectations of visitors to ensure high satisfaction among POS/GI users.
5	20	Shivanand Balram and Suzana Dragićevic	Balram & Dragićevic 2005	Balram & Dragićevic, 2005	Balram, S., and Dragićevic S. (2005). Attitudes toward urban green spaces: Integrating questionnaire survey and collaborative GIS techniques to improve attitude measurements. Landscape and Urban Planning, 71(2-4), 147-162.	2005	Attitudes toward urban green spaces: Integrating questionnaire survey and collaborative GIS techniques to improve attitude measurements	Landscape and Urban Planning	71(2-4), 147-162	1	2	Canada	West Island/End of Montreal Island	Montreal - Capital City Metropolitan Area	3	Not Speficied	4831	T	14	23	19	21	1	1	1	1	179	survey	0	1	0	1	0	0	1	NA	0	0	0	0	0	0	NA	1	1	Utilise this tool.
6	21	Martin Dallimer, Katherin N Irvine, Andrew M J Skinner, Zoe G Davies, James R Rouquette, Lorrain L Maltby, Philip H Warren, Paul R Armsworth and Kevin J Gaston.	Dallimer et al., 2012	Dallimer et al., 2012	Dallimer, M., Irvine, K. N., Skinner, A. M., Davies, Z. G., Rouquette, J. R., Maltby, L. L., ... and Gaston, K. J. (2012). Biodiversity and the feel-good factor: understanding associations between self-reported human well-being and species richness. BioScience, 62(1), 47-55.	2012	Biodiversity and the feel-good factor: understanding associations between self-reported human well-being and species richness	BioScience	62(1), 47-55	1	2	UK	South Yorkshire	Sheffield - Regional Centre Metropolitan Area	3	Not Speficied	1408	T	NR	NR	NR	NR	0	0	1	0	09 sites, 10-46 people at each site	pictures and survey	1	1	1	1	1	0	1	biodiversity	0	0	0	0	0	1	NA	1	1	mismatch between real level of biodiversity and GI users perception of species richness pose a serious challenge for aligning conservation and human well-being agendas
7	22	Margaret J. Grose	Grose, 2009	Grose, 2009	Grose, M. J. (2009). Changing relationships in public open space and private open space in suburbs in south-western Australia. Landscape and Urban Planning, 92(1), 53-63.	2009	Changing relationships in public open space and private open space in suburbs in south-western Australia	Landscape and Urban Planning	92(1), 53-63	3	1	Australia	Southwest Western Australia	Perth - Capital City Metropolitan Area	2	Not Speficied - Various Private and Pinlics Spaces	582	M	8	21	14	21	1	1	1	1	NA	NA	1	1	1	1	1	1	1	NA	1	1	1	1	1	1	NA	0	1	utilise this tool/methodology
8	23	Nurhayati Abdul Malek, Manohar Mariapan and Nik Ismail Azlan Ab Rahman	Malek, Mariapan & Ab Rahman, 2015	Malek et al., 2015	Malek, N. A., Mariapan, M., and Ab Rahman, N.I.A. (2015). Community participation in quality assessment for green open spaces in Malaysia. Procedia-Social and Behavioral Sciences, 168, 219-228.	2015	Community Participation in Quality Assessment for Green Open Spaces in Malaysia	Procedia - Social and Behavioral Sciences	168, 219-228	1	2	Malaysia	Southeast of Peninsular	1. Petaling Jaya - Kota Damansara 2. Kuala Lumpur - Taman Tun Dr. Ismail - Same Captial Metropolitan Area	2	1. Taman Rimba Riang 2. Taman Lembah Kiara	772	E	2. 73	2. 84	2. 78	2. 85	1	0	1	0	414	observation	0	0	0	0	0	0	0	activity/us of POS	0	0	0	0	0	0	NA	0	0	Utilise this tool.
9	24	Achmad Delianur Nasution and Wahyuni Zahrah	Nasution & Zahrah, 2014	Nasution & Zahrah, 2014	Nasution, A.D., and Zahrah, W. (2014). Community Perception on Public Open Space and Quality of Life in Medan, Indonesia. Procedia - Social and Behavioral Sciences, 153, 585-594	2014	Community Perception on Public Open Space and Quality of Life in Medan, Indonesia	Procedia - Social and Behavioral Sciences	153, 585-594	1	2	Indonesia	North Sumatra	Medan - Capital City Metropolitan Area	2	1. Lapangan Merdeka 2. Taman Beringin 3. Taman Ahmad Yani 4. Taman teladan	8481	E	NR	NR	NR	NR	0	0	1	0	384	survey	1	1	0	0	1	0	0	link between POS and QOL	0	0	0	0	1	0	NA	0	0	Do not reduce amount and quality of POS/GI.
10	25	Karen Villanueva, Hannah Badland, Paula Hooper, Mohammad Javad Koohsari, Suzanne Mavoa, Melanie Davern, Rebecca Roberts, Sharon Goldfeld, and Billie Giles-Corti	Villanueva et al., 2015	Villanueva et al., 2015	Villanueva, K., Badland, H., Hooper, P., Koohsari, M. J., Mavoa, S., Davern, M., ... and Giles-Corti, B. (2015). Developing indicators of public open space to promote health and wellbeing in communities. Applied Geography, 57, 112-119.	2015	Developing indicators of public open space to promote health and wellbeing in communities	Applied Geography	57, 112-119	3	1	Australia	Not Specified	Australian Cities	5	Not Speficied	NS	NS	NS	NS	NS	NS	1	1	1	1	NA	NA	1	1	0	1	1	1	1	NA	1	1	0	1	1	0	NA	0	1	Utilise this methodology.
11	26	Nicole Edwards , Paula Hooper, Georgina S.A. Trapp, Fiona Bull, Bryan Boruff and Billie Giles-Corti	Edwards, Hooper, Trapp, Bull, Boruff & Giles-Corti, 2013	Edwards et al., 2013	Edwards, N., Hooper, P., Trapp, G. S., Bull, F., Boruff, B., and Giles-Corti, B. (2013). Development of a public open space desktop auditing tool (POSDAT): a remote sensing approach. Applied Geography, 38, 22-30.	2013	Development of a Public Open Space Desktop Auditing Tool (POSDAT): A remote sensing approach	Applied Geography	38, 22-30	1	1	Australia	Southwest Western Australia	Perth - Capital City Metropolitan Area	3	Not Speficied	582	M	8	21	14	21	1	1	0	1	NA	Desktop study no participants	1	0	0	0	1	0	0	NA	0	0	0	0	0	0	NA	0	0	Utilise this tool.
12	27	David Crawford, Anna Timperio, Billie Giles-Corti, Kylie Ball, Clare Hume, Rebecca Roberta, Nick Andrianopouloa and Jo Salmon	Crawford et al., 2008	Crawford et al., 2008	Crawford, D., Timperio, A., Giles-Corti, B., Ball, K., Hume, C., Roberts, R., ... and Salmon, J. (2008). Do features of public open spaces vary according to neighbourhood socio-economic status?. Health and Place, 14(4), 889-893.	2008	Do features of public open spaces vary according to neighbourhood socio-economic status?	Health & Place	14(4), 889-893	1	1	Australia	Central Southern Victoria	Melbourne - Capital City Metropolitan Area	3	Not Speficied	767	T	1	15	2	16	0	1	1	1	540	existing data set	1	1	1	0	0	1	1	POS features	0	0	0	0	0	0	NA	0	0	Better quality POS will result in better health outcomes due to opportunity.
13	28	C. Battisti	Battisti, 2016	Battisti, 2016	Battisti, C. (2016). Experiential key species for the nature‐disconnected generation. Animal Conservation, 19(6), 485-487.	2016	Experiential key species for the nature-disconnected generation	Animal Conservation	19(6), 485-487.	4	3	Global	Not Applicable	Not Applicable	6	Not Applicable	NA	NA	NA	NA	NA	NA	1	0	1	0	NA	NA	1	1	1	0	0	0	1	NA	0	0	0	0	1	1	NA	1	1	Consider younger generations in all stages of planning and development so that they do not disconnect from nature.
14	29	Jasper Schipperijna, Ola Ekholmb, Ulrika K. Stigsdottera, Mette Toftagerb, Peter Bentsena, Finn Kamper-Jørgensenb and Thomas B. Randrupa,	Schipperijina et al., 2009	Schipperijina et al., 2009	Schipperijna, J., Ekholmb, O., Stigsdottera, U.K., Toftagerb, M., Bentsena, P., Kamper-Jørgensenb, F. and Randrupa, T. B. (2009). Factors influencing the use of green space: Results from a Danish national representative survey. Landscape and Urban Planning, 95(3), 130-137.	2009	Factors influencing the use of green space: Results from a Danish national representative survey	Landscape and Urban Planning	95(3), 130–137	1	2	Denmark	Country-Wide	Multiple Urban Areas	5	Not Specified	NS	T	NS	NS	NS	NS	0	1	1	1	11038	NA	1	0	0	1	0	0	0	NA	1	0	0	0	1	0	NA	0	0	Mini review of existing data set
15	30	Katherine N. Irvine, Patrick Devine-Wright, Sarah R. Payne, Richard A. Fuller, Birgit Painter and Kevin J. Gaston	Irvine, Devine-Wright, Payne, Fuller, Painter & Gaston, 2009	Irvine et al., 2009	Irvine, K. N., Devine-Wright, P., Payne, S.R., Fuller, R.A., Painter, B. and Gaston, K.J. (2009). Green space, soundscape and urban sustainability: An interdisciplinary, empirical study. Local Environment, 14(2), 155-172.	2009	Green space, soundscape and urban sustainability: an interdisciplinary, empirical study	Local Environment	14(2), 155-172	1	2	UK	South Yorkshire	Sheffield - Regional Centre Metropolitan Area	2	1 Devonshire Green 2. Ruskin Park 3. Hallam School Playing Fields	1408	T	NR	NR	NR	NR	0	0	1	1	70	NA	1	1	1	1	1	0	1	noise	0	0	0	1	1	1	limited noise	0	0	Access to quiet, natural places in urban areas can be enhanced by improving the ecological quality of urban green spaces through targeted planning and design.
16	31	Joanna Tonge and Susan A. Moore	Tonge & Moore, 2007	Tonge & Moore, 2007	Tonge, J. and Moore, S. A. (2007). Importance-satisfaction analysis for marine-park hinterlands: A Western Australian case study. Tourism Management, 28, 768-776.	2007	Importance-satisfaction analysis for marine-park hinterlands: A Western Australian case study	Tourism Management	28 768-776	1	1	Australia	Southwest Western Australia	Perth - Melville and Subiaco - Capital City Metropolitan Area	2	Higer traffic areas of Swan Estuary Marine Park at Alfred Cove and Pelican Point	582	M	8	21	14	21	1	0	1	1	130	Importance-performance assessment (IPA)	0	1	1	1	0	0	1	many others	0	0	0	0	0	0	NA	0	0	For most of the POS/GI/UN attributes, satisfaction exceeded importance and hence no management attention is needed. However, satisfaction was lower than importance for condition of the river and associated footpaths, and the presence of litter and wildlife, suggesting management attention is needed to address those issues.
17	32	Billie Giles-Corti, Melissa H. Broomhall, Matthew Knuiman, Catherine Collins, Kate Douglas, Kevin Ng, Andrea Lange and Robert J. Donovan	Giles-Corti et al. 2005	Giles-Corti et al. 2005	Giles-Corti, B., Broomhall, M. H., Knuiman, M., Collins, C., Douglas, K., Ng, K., ... and Donovan, R. J. (2005). Increasing walking: how important is distance to, attractiveness, and size of public open space?. American Journal of Preventive Medicine, 28(2), 169-176.	2005	Increasing Walking: How Important Is Distance To, Attractiveness, and Size of Public Open Space?	American Journal of Preventive Medicine	28(2), 169-176	1	1	Australia	Southwest Western Australia	Perth - Capital City Metropolitan Area	3	516 spaces/parks greater than 2 acres	582	M	8	21	14	21	1	1	1	1	516	survey, observation	1	1	1	1	1	1	1	recreation, ammenity, dos, safety, size of POS, design of POS	1	1	1	1	1	1	NA	0	0	Access to attractive, large POS is associated with higher levels of walking. To increase walking, thoughtful design (and redesign) of POS is required that creates large, attractive POS with facilities that encourage active use by multiple users (e.g., walkers, sports participants, picnickers).
18	33	Karen Ikin, Darren S. Le Roux, Laura Rayner, Nelida R. Villaseñor, Kathy Eyles, Philip Gibbons, Adrian D. Manning and David B. Lindenmayer	Ikin et al., 2015	Ikin et al., 2015	Ikin, K., Le Roux, D. S., Rayner, L., Villaseñor, N. R., Eyles, K., Gibbons, P., ... and Lindenmayer, D. B. (2015). Key lessons for achieving biodiversity‐sensitive cities and towns. Ecological Management and Restoration, 16(3), 206-214.	2015	Key lessons for achieving biodiversity-sensitive cities and towns	Ecological Management and Restoration	16(3), 206-214	2	1	Australia	Australian Captial Teritory and New South Wales	Not Speficied	5	Not Speficied	318	T	NS	NS	NS	NS	0	0	1	1	NA	Review Paper	0	0	1	1	1	1	1	biodiversity	0	0	0	0	0	0	NA	0	0	Lesson 1: The effects of urbanization on wildlife extend into adjacent habitats. Lesson 2: Strategic enhancement of urban greenspace offers biodiversity gains. Lesson 3: Large old trees need to be managed for long‐term sustainability. Lesson 4: Education and engagement connects residents with nature and raises awareness.
19	34	Sara Antognelli and Marco Vizzari	Antognelli & Vizzari, 2017	Antognelli & Vizzari, 2017	Antognelli, S., and Vizzari, M. (2017). Landscape liveability spatial assessment integrating ecosystem and urban services with their perceived importance by stakeholders. Ecological Indicators, 72, 703-725.	2017	Landscape liveability spatial assessment integrating ecosystem andurban services with their perceived importance by stakeholders	Ecological Indicators	72, 703–725	1	2	Italy	Umbria	Perugia - Captial City Metroploitian Area - Corciano, Deruta, Magione, Passignano, Perugia, Torgiano, Umbertide	3	Not Specified	368	M	NR	NR	NR	NR	1	1	1	1	NA	NA	0	1	1	1	1	1	1	NA	1	0	0	1	1	1	NA	0	0	We need to continue to identify contributing factors of city liveability particularly landscape contributions.
20	35	Massey, David	Massey, 2005	Massey, 2005	Massey, D. (2005). Liveable town and cities: Approaches for planners. The Town Planning Review, 76(3), 1-6.	2005	Liveable town and cities: approaches for planners	Town Planning Review	76(3), 1-6	2	2	England	Country-Wide	Not Specified	5	Not Specified	NS	T	NS	NS	NS	NS	0	0	1	1	NA	Review Paper	1	0	0	1	1	1	1	NA	0	0	0	0	0	0	good planning	0	0	Current opportunities in liveability planning are 'place making', 'local learning' and interrelationships.
21	36	Bronwen T. Taylor, Peter Fernando, Adrian E. Bauman, Anna Williamson, Jonathan C. Craig and Sally Redman	Taylor et al., 2011	Taylor et al., 2011	Taylor, B. T., Fernando, P., Bauman, A. E., Williamson, A., Craig, J. C., and Redman, S. (2011). Measuring the quality of public open space using Google Earth. American Journal of Preventive Medicine, 40(2), 105-112.	2011	Measuring the Quality of Public Open Space Using Google Earth	American Journal of Preventive Medicine	40(2), 105-112	1	1	Australia	Central Coastal New South Wales	Sydney - Campbelltown - Capital City Metropolitan Area	3	Not Specified	398	T	7	10	5	10	1	1	1	1	NA	POST Tool	1	1	1	0	0	0	1	POS assessment	1	1	1	1	1	0	NA	0	0	Use this tool/assessment method.
22	37	Sheona Shackleton, Abby Chinyimba, Paul Hebinck, Charlie Shackleton and Humphrey Kaoma	Shackleton, Chinyimba, Hebinck, Shackleton & Kaoma, 2015	Shackleton et al., 2015	Shackleton, S., Chinyimba, A., Hebinck, P., Shackleton, C., and Kaoma, H. (2015). Multiple benefits and values of trees in urban landscapes in two towns in northern South Africa. Landscape and Urban Planning, 136, 76-86.	2015	Multiple benefits and values of trees in urban landscapes in two towns in northern South Africa	Landscape and Urban Planning	136, 76–86	1	2	South Africa	Limpopo Province - Waterberg and Mopani District Municipalities	1. Bela Bela (WDM) - Regional Centre 2. Tzaneen (MDM) - Regional Centre	4	Not Specified	ND	A	NR	NR	NR	NR	0	0	1	1	600 households	interviews	0	0	0	0	1	1	1	NA	0	0	1	0	0	0	NA	0	0	Trees are perceived to be more valuable in lower income areas than higher income areas due to their use of resources and compensation for low amounts of infrastructure.
23	38	Benjamin James Barth, Sean Ian FitzGibbon and Robbie Stuart Wilson	Barth, FitzGibbon & Wilson, 2015	Barth et al., 2015	Barth, B. J., FitzGibbon, S. I., and Wilson, R. S. (2015). New urban developments that retain more remnant trees have greater bird diversity. Landscape and Urban Planning, 136, 122-129.	2015	New urban developments that retain more remnant trees have greater bird diversity	Landscape and Urban Planning	136, 122–129	1	1	Australia	Southeast Queensland	1. Brisbane and Redlands - Capital City Metropolitan Area 2. Gold Coast - Regional Centre	4	Not Specified	441	T	1. 18	1. 36	1. 22	1. 37	0	0	0	1	NA	observation	0	0	1	1	1	0	1	NA	0	0	0	0	0	1	NA	0	0	Retain trees and plant more trees!
24	39	Ljiljana Čavić and José Nuno Beirão	Čavić & Beirão 2014.	Čavić & Beirão 2014.	Čavić, L., and Beirão, J. N. (2014). Open Public Space Attributes and Categories - Complexity and Measurability. Arhitektura, Raziskave, 2(2), 15-24.	2014	Open Public Space Attributes and Categories - Complexity and Measurability	Architecture Research	2(2), 15-24	3	2	Europe-Wide	Europe-Wide	Not Specified	6	Not Specified	NA	NA	NS	NS	NS	NS	1	0	1	1	51 and other methods	NA	1	1	0	0	0	0	1	many	0	0	0	0	1	0	saftey, comfort	1	0	Use this tool for specified itemised categorised POS information on user satisfaction.
25	40	Cheryl Jones and David Newsome	Jones & Newsome, 2015	Jones & Newsome, 2015	Jones, C., and Newsome, D. (2015). Perth (Australia) as one of the world's most liveable cities: A perspective on society, sustainability and environment. International Journal of Tourism Cities, 1, 18-35.	2015	Perth (Australia) as one of the world's most liveable cities: a perspective on society, sustainability and environment	International Journal of Tourism Cities	1, 18-35	2	1	Australia	Capital City Metropolitian Region	Perth - Capital City Metropolitan Area	3	Not Specified	582	M	8	21	14	21	0	1	1	1	NA	Review Paper with Case Study	1	1	1	1	1	1	1	NA	1	1	0	1	1	1	NA	1	0	Include eco/environmental values and presence of those attributes into liveability models, which are currently deficient in their environmental sustainability focus.
26	41	Mung Balding and Kathryn J.H. Williams	Balding & Williams, 2016	Balding & Williams, 2016	Balding, M., & Williams, K. J. (2016). Plant blindness and the implications for plant conservation. Conservation Biology, 30(6), 1192-1199.	2016	Plant blindness and the implications for plant conservation	Conservation Biology	30(6), 1192–1199	3	3	Global	Not Applicable	Not Applicable	6	Braodly focused article, but specifically mentions Royal Botanic Gardens Melbourne	NA	NA	NA	NA	NA	NA	1	0	1	1	NA	essay	0	0	1	1	0	1	1	funding	0	0	0	0	0	1	NA	1	1	Support for plant/UN conservation may be garnered through strategies that promote identification and empathy with plants.
27	42	Agnes E. Van Den Berg, Terry Hartig and Henk Staats	Van Den Berg, Hartig & Staats, 2007	Van Den Berg, Hartig & Staats, 2007	Van den Berg, A. E., Hartig, T., and Staats, H. (2007). Preference for nature in urbanized societies: Stress, restoration, and the pursuit of sustainability. Journal of Social Issues, 63(1), 79-96.	2007	Preference for Nature in Urbanized Societies: Stress, Restoration, and the Pursuit of Sustainability	Journal of Social Issues	63(1), 79--96	2	3	Global	Not Applicable	Not Applicable	6	Mentions of studies in Netherlands, Sweden and Rome	NA	NA	NA	NA	NA	NA	0	1	1	1	110 and then 114	experiment	1	1	1	1	1	1	1	NA	1	1	1	1	1	1	NA	0	0	Carefully balance living density with psychological need to interaction with nature.
28	43	Konstantinos Tzoulas, Kalevi Korpela, Stephen Venn, Vesa Yli-Pelkonen, Aleksandra Kázmierczak, Jari Niemela and Philip James	Tzoulas et al., 2007	Tzoulas et al., 2007	Tzoulas, K., Korpela, K., Venn, S., Yli-Pelkonen, V., Ka´zmierczak, A., Niemela, J., and James, P. (2007). Promoting ecosystem and human health in urban areas using Green Infrastructure: A literature review. Landscape and Urban Planning, 81(3), 167-178.	2007	Promoting ecosystem and human health in urban areas using Green Infrastructure: A literature review	Landscape and Urban Planning	81(3), 167–178	2	2	Europe-Wide	Europe-Wide	Not Specified	6	Not Specified	NA	NS	NS	NS	NS	NS	1	0	1	1	NA	Review Paper	1	1	1	1	1	1	1	NA	0	0	0	1	1	1	NA	1	1	Review presents a conceptual framework that highlights how many dynamic factors, and their complex interactions, affect ecosystem health and human health in urban areas. Proposed framework forms the context into which existing and new research can be placed. In this way it forms the basis for a new interdisciplinary research agenda.
29	44	Jiří Schneider and Helena Lorencová	Schneider & Lorencová, 2015	Schneider & Lorencová, 2015	Schneider, J., and Lorencová, H. (2015). Recreational activities, practices and attitudes of visitors to the protected landscape areas as a basis for resolving conflicts of recreation and nature protection. Acta Universitatis Agriculturae et Silviculturae Mendelianae Brunensis, 63(5), 1555-1564.	2015	Recreational activities, practices and attitudes of visitors to the protected landscape areas as a basis for resolving conflicts of recreation and nature protection	Acta Universitatis Agriculturae et Silviculturae Mendelianae Brunensis	63(5), 1555–1564.	1	2	Czech Republic	South Moravian Region	Brno - Sloup, Blansko and Jedovnice - Capital City Metropolitan Area	3	Various spaces in the Moravian Karst Protected Area	1668	T	NR	NR	NR	NR	0	0	1	1	108	NA	0	1	0	0	0	1	1	NA	0	0	0	0	0	0	NA	1	1	Survey revealed that most visitors did not feel there experience was limited by conservation measures. Most visitors reported they would consider a return visit , which is evidence that the area has something to offer one-off and repeat visitors.
30	45	Masashi Soga, Yuichi Yamaura, Tetsuya Aikoh, Yasushi Shoji, Takahiro Kubo and Kevin J. Gaston	Soga, Yamaura, Aikoh, Shoji, Kubo & Gaston, 2015	Soga et al., 2015	Soga, M., Yamaura, Y., Aikoh, T., Shoji, Y., Kubo, T., and Gaston, K. J. (2015). Reducing the extinction of experience: Association between urban form and recreational use of public greenspace. Landscape and Urban Planning, 143, 69-75.	2015	Reducing the extinction of experience: Association between urban form and recreational use of public greenspace	Landscape and Urban Planning	143, 69–75	1	2	Japan	Central East Honshu Island	Tokyo - Capital City Metropolitan Area	2	Not Specified	14789	T	15	47	22	50	0	1	1	1	1644	survey	1	1	1	1	1	1	1	NA	1	0	0	1	1	1	NA	1	1	Balance urbanisation with giving adequate opportunities for nature experience.
31	46	Micheal Hughes	Hughes, 2014	Hughes, 2014	Hughes, M. (2014). Researching the links between parklands and health. In Voigt, C. and Pforr, C. (Eds), Wellness tourism: a destination perspective. (pp. 147-160), UK: Routledge.	2014	Researching the links between parklands and health	Edited Book	Chap. 9, pp. 147-160	2	3	Global	Not Applicable	Not Applicable	6	Not Applicable	NA	NA	NA	NA	NA	NA	0	0	0	0	NA	Review Paper	1	1	1	1	1	1	1	NA	1	0	1	1	1	1	NA	0	0	Consider the value and benefits of POS on a wider level and plan for these to be created.
32	47	Chris Hagerman	Hagerman, 2007	Hagerman, 2007	Hagerman, C. (2007). Shaping neighborhoods and nature: Urban political ecologies of urban waterfront transformations in Portland, Oregon. Cities, 24(4), 285-297.	2007	Shaping neighborhoods and nature: Urban political ecologies of urban waterfront transformations in Portland, Oregon	Cities	24(4) 285-297	2	2	United States of America	Oregan	Portland - Capital City Metropolitan Area	3	Not Specified	1850	T	NR	NR	NR	NR	0	0	1	0	NA	NA	0	0	1	1	1	0	1	NA	0	0	0	0	1	1	quality planning	0	1	Quality urban and GI planning will lead to quality installations and rehabilitation/renaturing of degraded areas.
33	48	Alia M. Dietsch, Tara L. Teel and Michael J. Manfredo	Dietsch, Teel & Manfredo, 2016	Dietsch, Teel & Manfredo, 2016	Dietsch, A. M., Teel, T. L., and Manfredo, M. J. (2016). Social values and biodiversity conservation in a dynamic world. Conservation Biology, 30(6), 1212-1221.	2016	Social values and biodiversity conservation in a dynamic world	Conservation Biology	30(6), 1212–1221	1	2	United States of America	Washington	State-Wide	5	Not Specified	4311	T	NA	NA	NA	NA	0	0	0	1	4183	survey	0	0	1	0	0	0	1	biodiversity, humanistic	0	0	0	0	0	1	NA	0	1	Values influence behaviours. Therefore creating values of biodiversity/conservation will improve human behaviour and pro-environmental choices.
34	49	Grant Revell and Martin Anda	Revell & Anda, 2014	Revell & Anda, 2014	Revell, G., and Anda, M. (2014). Sustainable urban biophilia: The case of greenskins for urban density. Sustainability, 6(8), 5423-5438.	2014	Sustainable Urban Biophilia: The Case of Greenskins for Urban Density	Sustainabiltiy	6(8), 5423-5438	3	1	Australia	Southwest Western Australia	Perth - Fremantle - Capital City Metropolitan Area (also Adelaide, South Australia mentioned in Absratct, but not in main paper)	2	1. Fremantle Libraray Building 2. Gino's Café 3. Westgate Mall 4. CUSP Building 5. PSARTS Building	582	M	8	21	14	21	0	0	0	0	NA	Review Paper with Design Informational	0	0	1	0	1	0	0	green infrastructure	0	0	0	1	0	1	green infrastructure	1	1	Collaborate thoughts and research for the overall gain in all urban businesses/industries.
35	50	Gregory N. Bratman, J. Paul Hamilton and Gretchen C. Daily	Bratman, Hamilton & Daily, 2012	Bratman et al., 2012	Bratman, G. N., Hamilton, P., and Daily, G. C. (2012). The impacts of nature experience on human cognitive function and mental health. New York Academy of Sciences, 1249, 118-136.	2012	The impacts of nature experience on human cognitive function and mental health	New York Academy of Sciences	1249, 118–136	2	3	Global	Not Applicable	Not Applicable	6	Not Applicable	NA	NA	NA	NA	NA	NA	1	0	1	0	NA	Review Paper with Categorisation	1	1	1	1	0	0	1	n/a	0	0	0	0	0	0	NA	1	1	Utilise this tool.
36	51	M. Hillsdona, J. Panter, C Foster and A. Jones	Hillsdon, Panter, Foster & Jones, 2006	Hillsdon et al., 2006	Hillsdon, M., Panter, J., Foster, C., and Jones, A. (2006). The relationship between access and quality of urban green space with population physical activity. Public Health, 120(12), 1127-1132.	2006	The relationship between access and quality of urban green space with population physical activity	Public Health	120(12), 1127-1132	1	2	UK	Norfolk County	Norwich	3	Not Specified	ND	T	NR	NR	NR	NR	0	1	1	1	4950, exitsing data set	NA	1	1	0	0	0	0	0	acess to POS, activitiy level at POS	0	0	0	0	0	0	NA	1	0	Access to urban green spaces does not appear to be associated with population levels of recreational physical activity in our sample of middle-aged adults.
37	52	Anna Chiesura	Chiesura, 2004	Chiesura, 2004	Chiesura, A. (2004). The role of urban parks for the sustainable city. Landscape and Urban Planning, 68(1), 129-138.	2004	The role of urban parks for the sustainable city	Landscape and Urban Planning	68(1), 129-138	1	2	Netherlands	Centeral West	Amsterdam - Capital City Metropolitan Area	1	Vondelpark	3747	T	26	11	26	12	0	0	1	1	467	survey	1	1	1	0	1	0	1	NA	0	0	0	0	1	1	NA	1	1	Results confirm that the experience of nature in urban environment is source of positive feelings and beneficial services, which fulfil important immaterial and non-consumptive human needs. Implications for the sustainability of the city will be analysed and discussed.
38	53	Danielle F. Shanahan, Brenda B. Lin, Robert Bush, Kevin J. Gaston, Julie H. Dean, Elizabeth Barber and Richard A. Fuller	Shanahan et al., 2015	Shanahan et al., 2015	Shanahan, D. F., Lin, B. B., Bush, R., Gaston, K. J., Dean, J. H., Barber, E., and Fuller, R. A. (2015). Toward improved public health outcomes from urban nature. American Journal of Public Health, 105(3), 470-477.	2015	Toward Improved Public Health Outcomes From Urban Nature	American Journal of Public Health	105(3), 470-477	2	3	Global	Not Applicable	Not Applicable	6	Not Applicable	NA	NA	NA	NA	NA	NA	1	1	1	1	NA	Review Paper	1	1	1	1	1	1	1	NA	1	1	1	1	1	1	env health outcomes	1	1	Articulates a framework for identifying direct and indirect causal pathways through which nature delivers health benefits, boundaries between ecology and health. Propose that this will lead to cost-effective and tailored solutions that could enhance population health and reduce public health inequalities.
39	54	Terry Hartig, Gary W. Evans, Larry D. Jamner, Deborah S. Davis and Tommy Gärling	Hartig, Evans, Jamner, Davis & Gärling, 2003	Hartig et al., 2003	Hartig, T., Evans, G. W., Jamner, L. D., Davis, D. S., and Gärling, T. (2003). Tracking restoration in natural and urban field settings. Journal of Environmental Psychology, 23(2), 109-123.	2003	Tracking restoration in natural and urban field settings	Journal of Environmental Psychology	23(2), 109–123	1	2	United States of America	Southwest California	Los Angeles - Southeast	1	Audubon Society's Starr Ranch Sanctuary	36	M	51	48	50	64	0	0	1	0	110	physical response	1	1	1	0	0	0	0	NA	1	0	0	0	1	0	NA	0	0	Discusses implications of the results for theories about restorative environments and environmental health promotion measures.
40	55	Catharine Ward Thompson	Thompson, 2002	Thompson, 2002	Thompson, C. W. (2002). Urban open space in the 21st century. Landscape and Urban Planning, 60(2), 59-72.	2002	Urban open space in the 21st century	Landscape and Urban Planning	60(2), 59-72	2	2	Global	Not Applicable	Not Applicable	6	Various spaces mentioned, including United Kingdom broadly, Birmingham more specifically and Barcelona	NA	NA	NA	NA	NA	NA	1	1	1	1	NA	Review Paper	1	1	0	1	1	0	1	NA	1	0	0	0	1	0	refining definitions to be more inclusive	0	0	A more flexible approach to open space definition and usage is proposed, recognising ‘loose-fit’ landscapes which allow opportunities for the socially marginalised and the ecologically shifting within a dynamic framework of urban structures and networks.
41	56	Seth Appiah-Opoku	Appiah-Opoku, 2011	Appiah-Opoku, 2011	Appiah-Opoku, S. (2011). Using protected areas as a tool for biodiversity conservation and ecotourism: A case study of Kakum National Park in Ghana. Society and Natural Resources, 24(5), 500-510.	2011	Using Protected Areas as a Tool for Biodiversity Conservation and Ecotourism: A Case Study of Kakum National Park in Ghana	Society and Natural Resources	24(5), 500-510	1	2	Ghana	Central Region, southern Ghana	1. Cape Coast 2. Twifo Praso 3. Assin Fosu - Regional Centres	5	Kakum National Park	ND	E	NR	NR	NR	NR	1	0	1	1	100	Focus Groups	0	0	1	0	0	1	1	livelihood	0	0	0	0	0	0	NA	0	0	One of the townships/villages has been innovative in using the creation of the National Park to improve livelihoods in the community and could serve as a model to others.
42	57	Yuno Do, Seong-Bo Kim, Ji Yoon Kim and Gea-Jae Joo	Do, Kim, Kim & Joo, 2015	Do et al., 2015	Do, Y., Kim, S.B., Kim, J.Y. and Joo, G.J. (2015). Wetland-based tourism in South Korea: Who, When, and Why. Wetlands Ecology and Management, 23(4), 779-787.	2015	Wetland-based tourism in South Korea: who, when, and why	Wetlands Ecology and Management	23(4), 779-787	1	2	South Korea	Southest South Korea	Busan	3	1. Upo Wetlands 2. Junam Wetlands 3. Nakdong River Estuary 4. Suncheon Bay	4401	T	NR	91	NR	93	0	0	1	1	600	survey	0	1	1	0	0	1	1	educational	0	0	0	0	1	1	ecotourism opportunities	0	1	Visiting wetlands is becoming an increasingly popular form of ecotourism in South Korea, supporting the importance of preserving these fragile ecosystems and services they provide.
43	58	P.E.R. Dale and R. Connelly	Dale & Connelly, 2013	Dale & Connelly, 2013	Dale, P. E. R., & Connelly, R. (2012). Wetlands and human health: an overview. Wetlands Ecology and Management, 20(3), 165-171.	2012	Wetlands and human health: an overview	Wetlands Ecology and Management	20(3), 165-171	2	3	1. Australia 2. United States of America	1. Queens;and and New South Wales - Notheast Aust 2. Nebraskaand Flordia in USA.	NA	6	NA	NA	NA	NA	NA	NA	NA	0	1	1	1	NA	Review Paper	1	1	1	1	1	1	1	NA	0	0	0	1	1	1	wetland quality	0	0	Can minimise health risks (e.g. mosquito borne disease) while restoring or maintaining wetland function or by exploring knowledge needs that would facilitate wise management.
44	59	Lucy E. Keniger, Kevin J. Gaston, Katherine N. Irvine and Richard A. Fuller	Keniger, Gaston, Irvine & Fuller, 2013	Keniger et al., 2013	Keniger, L. E., Gaston, K. J., Irvine, K. N., and Fuller, R. A. (2013). What are the benefits of interacting with nature? International Journal of Environmental Research and Public Health, 10, 913-935.	2013	What are the Benefits of Interacting with Nature?	International Journal of Environmental Research and Public Health	10, 913-935	2	3	Global	Not Applicable	Not Applicable	6	Not Applicable	NA	NA	NA	NA	NA	NA	0	0	1	1	NA	Review Paper	1	1	1	0	1	1	1	NA	0	0	0	0	1	0	NA	1	1	Need more research into which characteristics of natural settings (e.g., biodiversity, level of disturbance, proximity, accessibility) are most important for triggering a beneficial interaction, and how these characteristics vary in importance among cultures, geographic regions and socio-economic groups. These are key directions for future research if humans are to design landscapes that promote …
45	60	D.F. Shanahan, B.B. Lin, K.J. Gaston, R. Bush and R.A. Fuller	Shanahan, Lin, Gaston, Bush & Fuller, 2015	Shanahan et al., 2015	Shanahan, D.F., Lin, B.B., Gaston, K.J., Bush, R. and Fuller, R.A. (2015). What is the role of trees and remnant vegetation in attracting people to urban parks? Landscape Ecology, 30, 153-165.	2015	What is the role of trees and remnant vegetation in attracting people to urban parks?	Landscape Ecology	30, 153-165	1	1	Australia	South East Queensland	Brisbane - Capital City Metropolitan Area	3	Not Specified	441	T	18	36	22	37	0	1	1	1	670	survey	1	1	1	0	1	0	1	educational	0	0	0	0	1	1	environmental understanding	1	0	To optimise recreational benefits from ecologically valuable spaces, a range of social or educational interventions are required to enhance people’s connection to nature.
46	61	Henk Staats, Arenda Kieviet and Terry Hartig	Staats, Kieviet & Hartig, 2003	Staats, Kieviet & Hartig, 2003	Staats, H., Kieviet, A. and Hartig, T. (2003). Where to recover from attentional fatigue: An expectancy-value analysis of environmental preference. Journal of Environmental Psychology, 23(2), 147-157.	2003	Where to recover from attentional fatigue: An expectancy-value analysis of environmental preference	Journal of Environmental Psychology	23(2), 147–157	3	2	Netherlands	Centeral West	Rotterdam - Major City Metropolitan Area	3	Not Specified	2987	T	NR	NR	NR	NR	0	0	1	1	101	interviews	1	1	0	0	1	0	1	health	0	0	0	0	0	0	NA	0	0	Fatigued participants twice more strongly preferred images of forests over city images, likely due to greater restoration more positive evaluation of recovery in the natural environment. Results have implications for environmental preference conceptualizations and understanding of the relationship between preference and fatigue restoration.
47	62	Jacinta Francis, Billie Giles-Corti, Lisa Wood and Matthew Knuiman	Francis, Giles-Corti, Wood & Knuiman, 2012	Francis et al., 2012	Francis, J., Giles-Corti, B., Wood, L. and Knuiman, M. (2012). Creating sense of community: The role of public space. Journal of Environmental Psychology, 32(4), 401-409.	2012	Creating sense of community: The role of public space	Journal of Environmental Psychology	32(4), 401-409	1	1	Australia	Southwest Western Australia	Perth - Capital City Metropolitan Area	2	Not Specified - 4 POS Sites	582	M	8	21	14	21	0	1	1	1	911	POS Audit	1	1	0	0	1	0	1	Safety	0	0	0	0	1	0	Sense of community	1	0	The quality of POS increases the sense of community which brings about numerous benefits.
48	63	Ling Gabriel Hoh Teck, Ho Chin Siong, Hishamuddin Mohd Ali and Fan Tu	Hock Teck, Chin Soing, Ali & Tu, 2016	Hock Teck et al., 2016	Hock Teck, L.H., Chin Siong, H., Ali H.M. and Tu, F. (2016). Do institutions matter in neighbourhood commons governance? A two-stage relationship between diverse property-rights structure and residential public open space (POS) quality: Kota Kinabalu and Penampang, Sabah, Malaysia. International Journal of the Commons, 10(1), 294–333.	2016	Do institutions matter in neighbourhood commons governance? A two-stage relationship between diverse property-rights structure and residential public open space (POS) quality: Kota Kinabalu and Penampang, Sabah, Malaysia	International Journal of the Commons	10(1), 294–333	3	2	Malaysia	West Coast Division	Kota Kinabalu including Penampang - Capital City Metropolitan Area	3	No Specified	789	E	NR	NR	NR	NR	0	1	0	1	NA	Observation and POS audit tool	0	0	0	1	0	1	1	POS owner influences	0	0	0	0	0	0	NA	1	0	Provides evidence that private ownership may deliver higher quality POS than under a commons-based government management model and privately POS may be further enhanced by ongoing involvement and support from the local community.
49	64	Fodei M. Conteh and Derya Oktay	Conteh & Oktay, 2016	Conteh & Oktay, 2016	Conteh, F.M. and Oktay, D. (2016). Measuring Liveability by Exploring Urban qualities of Kissy Street, Freetown, Sierra Leone. Open House International, 41(2), 23-30.	2016	Measuring Liveability by Exploring Urban qualities of Kissy Street, Freetown, Sierra Leone	Open House International	41(2), 23-30	3	2	Sierra Leone	Northwest Sierra Leone	Freetown	1	Kissy Street	11603	E	NR	NR	NR	NR	0	0	1	1	130	Observations	1	0	0	1	1	1	1	Overcrowding	0	0	0	0	0	0	Negative effect of overcrowding on liveability	0	0	Overcrowding that negatively impact all-inclusive public space may be managed/ curtailed by: providing pedestrian only precincts and city wide promenades; using coastal waters as a highway or main street to provided transportation alternatives that reduce car traffic from the inner city areas; empower people and giving them control over their environment and engender in them a sense of belonging.
50	65	Vicky Cattell, Nick Dines, Wil Gesler and Sarah Curtis	Cattell, Dines, Gesler & Curtis, 2008	Cattell et al., 2008	Cattell, V., Dines, N., Gesler, W. and Curtis, S. (2008). Mingling, observing, and lingering: Everyday public spaces and their implications for well-being and social relations. Health & Place, 14(3), 544-561.	2008	Mingling, observing, and lingering: Everyday public spaces and their implications for well-being and social relations	Health & Place	14(3), 544–561	3	2	United Kingdom	Southeast England	East London - Capital City Metropolitan Area	2	Various, including Plashet Park and Priory Park.	5175	T	53	40	48	41	0	0	1	0	NA	Interview	1	1	1	1	1	1	1	NA	0	0	0	1	1	1	Opportunity to be social	0	0	Policy approaches that maximise the social and therapeutic properties of a range of everyday spaces are being more widely recognised and nurtured.
51	66	Adam Okulicz-Kozaryn	Okulicz-Kozaryn, 2011	Okulicz-Kozaryn, 2011	Okulicz-Kozaryn, A. (2013). City life: Rankings (livability) versus perceptions (satisfaction). Social Indicators Research, 110(2), 433-451.	2013	City Life: Rankings (Livability) Versus Perceptions (Satisfaction)	Social Indicators Research	110(2), 433–451	3	2	Europe-Wide	Europe-Wide	Dallas - Capital City Metropolitan Area	6	Not Specified	NA	NA	NA	NA	NA	NA	1	0	1	0	large existing data set	NA	1	1	1	0	1	0	1	NA	1	1	1	1	1	1	NA	0	0	Pay more attention to subjective indicators of quality of life. After all, what matters is what we perceive, not what is out there.
52	67	Achmad Delianur Nasution and Wahyuni Zahrah	Nasution & Zahrah, 2012	Nasution & Zahrah, 2012	Nasution, A.D. and Zahrah, W. (2012). Public open space privatization and quality of life, case study Merdeka Square Medan. Procedia-Social and Behavioral Sciences, 36, 466-475	2012	Public Open Space Privatization and Quality of Life, Case Study Merdeka Square Medan	Procedia - Social and Behavioral Sciences	36, 466 – 475	3	2	Indonesia	North Sumatra	Medan	1	Merdeka Square	8481	E	NR	NR	NR	NR	0	0	1	0	113	observation	1	1	0	1	1	0	1	NA	0	0	0	1	1	0	NA	0	0	Further research needed to investigate perception of lower income people about public open space in relation with their quality of life, so it can be claimed that open public space is made for all class of people.
53	68	Wakhidah Kurniawati	Kurniawati, 2012	Kurniawati, 2012	Kurniawati, W. (2012). Public space for marginal people. Procedia-Social and Behavioral Sciences, 36, 476-484.	2012	Public Space for Marginal People	Procedia - Social and Behavioral Sciences	36, 476 – 484	3	2	Indonesia	North coast Central Java	Semarang - Major Regional Metropolitan Centre	1	5 locations in Simpang Lima area	4700	E	NR	NR	NR	NR	1	0	1	0	80	observation	1	0	0	0	1	0	1	NA	1	0	0	0	1	0	opportunity to enjoy space	0	0	When the physical aspects of space can accommodate the space needs of the Forgotten, accommodative public space will be created
54	69	Takemi Sugiyama, Lucy D. Gunn, Hayley Christian, Jacinta Francis, Sarah Foster, Paula Hooper, Neville Owen and Billie Giles-Corti	Sugiyama et al., 2015	Sugiyama et al., 2015	Sugiyama, T., Gunn, L.D., Christian, H., Francis, J., Foster, S., Hooper, P., ... and Giles-Corti, B. (2015). Quality of public open spaces and recreational walking. American Journal of Public Health, 105(12), 2490-2495.	2015	Quality of Public Open Spaces and Recreational Walking	American Journal of Public Health	105(12), 2490-2495	1	1	Australia	Southwest Western Australia	Perth - Capital City Metropolitan Area	3	Not Specified	582	M	8	21	14	21	1	1	1	0	1813	NA	1	1	0	1	0	0	1	NA	1	1	0	0	1	0	NA	0	1	Building one high-quality local park may be more effective in promoting recreational walking than is providing many average-quality parks.
55	70	Jacinta Francis, Lisa J. Wood, Matthew Knuiman and Billie Giles-Corti	Francis, Wood, Knuiman & Giles-Corti, 2012	Francis et al., 2012	Francis, J., Wood, L.J., Knuiman, M. and Giles-Corti, B. (2012). Quality or quantity? Exploring the relationship between Public Open Space attributes and mental health in Perth, Western Australia. Social Science & Medicine, 74(10), 1570-1577.	2012	Quality or quantity? Exploring the relationship between Public Open Space attributes and mental health in Perth, Western Australia	Social Science & Medicine	74(10), 1570-1577	1	1	Australia	Southwest Western Australia	Perth - Capital City Metropolitan Area	2	Not Specified	582	M	8	21	14	21	1	1	1	1	911	NA	1	1	0	1	1	0	1	NA	1	0	0	1	1	0	NA	1	1	From a mental health perspective, POS/GI quality within a neighbourhood appears to be more important than POS/GI quantity. This finding has policy implications and warrants further investigation.
56	71	Wei Zhang	Zhang, 2012	Zhang, 2012	Zhang, W. (2012). Research on how to Improve the Liveability of City Community. Applied Mechanics and Materials, 174-177, 3503-3506.	2012	Research on How to Improve the Liveability of City Community	Applied Mechanics and Materials	174-177, 3503-3506	2	3	Global	Not Applicable	Not Applicable	6	Not Applicable	NA	NA	NA	NA	NA	NA	1	0	0	0	NA	Review Paper	1	1	1	1	1	1	1	NA	1	1	1	1	1	1	education	1	0	Paper aims to synthesize a set of innovative approaches to improve the liveability of our living places and make cleaner, greener and safer communities.
57	72	Margaret C Stanley, Jacqueline R Beggs, Imogen E Bassett, Bruce R Burns, Kim N Dirks, Darryl N Jones, Wayne L Linklater, Cate Macinnis-Ng, Robyn Simcock, Gayle Souter-Brown, Sam A Trowsdale and Kevin J Gaston	Stanley et al., 2015	Stanley et al., 2015	Stanley, M. C., Beggs, J. R., Bassett, I. E., Burns, B. R., Dirks, K. N., Jones, D. N., ... and Trowsdale, S. A. (2015). Emerging threats in urban ecosystems: a horizon scanning exercise. Frontiers in Ecology and the Environment, 13(10), 553-560	2015	Emerging threats in urban ecosystems: a horizon scanning exercise	Frontiers in Ecology and the Environment	13(10), 553–560	2	3	Global	Not Applicable	Not Applicable	6	Not Applicable	NA	NA	NA	NA	NA	NA	1	0	1	1	0	Review Paper for Horizon Scanning	0	0	1	0	0	1	1	0	0	0	0	0	0	0	NA	0	0	Given the accelerated rate of technological advancement and the increasing demands of urbanized populations, horizon scanning should be conducted routinely for urban ecosystems.
58	73	Peter Howley , Mark Scott and Declan Redmond	Howley, Scott & Redmond, 2009	Howley et al., 2009	Howley, P., Scott, M. and Redmond, D. (2009). Sustainability versus liveability: An investigation of neighbourhood satisfaction. Journal of Environmental Planning and Management, 52(6), 847-864.	2009	Sustainability versus liveability: an investigation of neighbourhood satisfaction	Journal of Environmental Planning and Management	52(6), 847-864	3	2	Ireland	Central East Coast	Dublin - Capital City Metropolitan Area	3	Not Specified	4588	T	42	34	41	34	0	0	1	1	070 surveys and 1709 other data	NA	1	1	0	1	1	1	1	noise traffic	0	0	0	1	1	0	Sense of community	0	0	Creating sustainable cities requires more than simply increasing residential densities and urban quality of life is crucial in developing liveable, stable and vibrant communities ... it is not high density per se that is the source of dissatisfaction but rather other related factors such as environmental quality, noise, lack of community life, traffic and lack of services and facilities.
59	74	E. Horan, J. Craven and R. Goulding	Horan, Craven & Goulding, 2014	Horan et al., 2014	Horan, E., Craven, J. and Goulding, R. (2014). Sustainable urban development and liveability. How can Melbourne retain its title as the world’s most liveable city and strive for sustainability at the same time?. European Journal of Sustainable Development, 3(4), 61-70.	2014	Sustainable Urban Development and Liveability. How can Melbourne Retain its title as the World’s Most Liveable City and Strive for Sustainability at the Same Time?	European Journal of Sustainable Development	3(4), 61-70	2	1	Australia	Central Southern Victoria	Melbourne - Capital City Metropolitan Area	3	Not Specified	767	T	1	15	2	16	0	1	1	1	NA	Review Paper	0	1	1	1	1	1	1	transport sustainability	0	0	0	0	0	0	sustainable transport and density planning	0	0	The concept of satellite urbanisation could be applied to Melbourne to relieve the growth pressures on the city and revitalise rural areas many of which are experiencing economic and population decline.
60	75	Tan Khee Giap, Woo Wing Thye and Grace Aw	Giap, Thye & Aw, 2014	Giap et al., 2014	Giap, T. K., Thye, W. W., & Aw, G. (2014). A new approach to measuring the liveability of cities: the Global Liveable Cities Index. World Review of Science, Technology and Sustainable Development, 11(2), 176-196.	2014	A new approach to measuring the liveability of cities: the Global Liveable Cities Index	World Review of Science, Technology and Sustainable Development	11(2), 176-196	3	3	Global	Not Applicable	Not Applicable	6	Not Applicable	NA	NA	NA	NA	NA	NA	1	1	1	1	64 cities	previous GLCI	1	1	1	1	1	1	1	health care, transport	1	1	1	1	1	1	NA	0	0	Provides yet another new measure of liveability.
61	76	Aleksandra Kázmierczak	Kázmierczak, 2013	Kázmierczak, 2013	Kaźmierczak, A. (2013). The contribution of local parks to neighbourhood social ties. Landscape and Urban Planning, 109(1), 31-44.	2013	The contribution of local parks to neighbourhood social ties	Landscape and Urban Planning	109(1), 31– 44	3	2	United Kingdom	Northwest England	1. Manchester/Salford/Trafford - Regional Centre Metropolitan Area	2	Various parks in the suburbs of Moss Ford, Old Trafford and Ordsall.	11451	T	46	NR	35	NR	0	0	1	1	470	survey	1	1	0	0	0	0	1	Sense of community	1	1	0	1	1	0	Sense of community	0	0	The findings suggest that local parks may support the development of social ties in inner-city areas. Associations were found between the quality of the parks, the character of visits, and the extent of social ties in the neighbourhood. The study concludes that for inner-city parks to realise their full potential in supporting social interactions and developing social ties, they need to be well-m…
62	77	Anna Hausmann, Rob Slotow, Jonathan K. Burns and Enrico Di Minin	Hausmann, Slotow , Burns & Di Minin, 2016	Hausmann et al., 2016	Hausmann, A., Slotow, R.O.B., Burns, J.K. and Di Minin, E. (2016). The ecosystem service of sense of place: benefits for human well-being and biodiversity conservation. Environmental Conservation, 43(2), 117-127.	2016	The ecosystem service of sense of place: benefits for human well-being and biodiversity conservation	Environmental Conservation	43(2), 117–127	2	3	Global	Not Applicable	Not Applicable	6	Not Applicable	NA	NA	NA	NA	NA	NA	1	0	1	0	NA	Review Paper	1	1	1	1	1	1	1	since of place	0	0	0	0	1	1	since of place	1	1	Further research is needed to fill existing gaps in knowledge. Review contributes to a better understanding of the role biodiversity plays in human well-being, and should inform the Intergovernmental Platform on Biodiversity and Ecosystem Services (IPBES).
63	78	Shuhana Shamsuddin, Nur Rasyiqah Abu Hassan and Siti Fatimah Ilani Bilyamin	Shamsuddin, Hassan & Bilyamin, 2012	Shamsuddin et al., 2012	Shamsuddin, S., Hassan, N.R.A. and Bilyamin, S.F.I. (2012). Walkable environment in increasing the liveability of a city. Procedia-Social and Behavioral Sciences, 50, 167-178.	2012	Walkable Environment in Increasing the Liveability of a City	Procedia - Social and Behavioral Sciences	50, 167 – 178	1	2	Malaysia	Southeast of Peninsular	Kuala Lumpur - Capital City Metropolitan Area	2	Not Specified	772	E	73	84	78	85	1	0	1	0	NA	NA	1	0	0	0	1	1	1	NA	0	1	0	0	1	0	walking infrastructure	0	0	it is crucial to promote a walkable lifestyle where the citizens are given the option to walk comfortably in the city
Papers included from reference list checking and other sources
64	4	Greg Simpson and David Newsome	Simpson & Newsome, 2017	Simpson & Newsome, 2017	Simpson, G., & Newsome, D. (2017). Environmental history of an urban wetland: from degraded colonial resource to nature conservation area. Geo: Geography and Environment, 4(1), e00030	2017	Environmental history of an urban wetland: from degraded colonial resource to nature conservation area	Geo: Geography and Environment	4(1), e00030	2	1	Australia	Southwest Western Australia	Perth - Claremont - Capital City Metropolitan Area	1	Lake Claremont	582	M	8	21	14	21	0	0	1	0	NA	Review Paper covering peer-reviewed articles, grey lit., and historical docs.	1	1	1	1	1	1	1	human values, conservation	0	0	1	1	1	1	changing community values, urban nature, renaturing	0	0	Demonstrates how the right policy setting and community engagement can rapidly renature degraded urban sites, but caution about need for ongoing commitment to 'green' policies.
65	79	John Gelissen	Gelissen, 2007	Gelissen, 2007	Gelissen, J. (2007). Explaining popular support for environmental protection: A multilevel analysis of 50 nations. Environment and Behaviour, 39(3), 392-415.	2007	Explaining popular support for environmental protection a multilevel analysis of 50 nations	Environment and Behaviour	39(3), 392-415	1	3	Global	Not Applicable	Not Applicable	6	Not Applicable	NA	NA	NA	NA	NA	NA	0	0	1	1	large existing data set	survey	0	0	1	0	0	1	1	environmental support	0	0	0	0	0	0	NA	0	0	Affluence is the main contributing factor in determining those who will provide financial environmental support.
66	80	Nathan James Bennett	Bennett, 2016	Bennett, 2016	Bennett, N.J. (2016). Using perceptions as evidence to improve conservation and environmental management. Conservation Biology, 30(3), 582-592.	2016	Using perceptions as evidence to improve conservation and environmental management	Conservation Biology	30(3), 582-592	2	3	Global	Not Applicable	Not Applicable	6	Not Applicable	NA	NA	NA	NA	NA	NA	0	0	1	0	NA	Review Paper	0	0	1	0	0	0	1	conservation	0	0	0	0	0	0	NA	1	1	More research required into human perceptions of GI and Urban Nature.
67	81	Michael J. Manfredo, Tara L. Teel and Alia M. Dietsch	Manfredo, Teel & Dietsch, 2016	Manfredo et al., 2016	Manfredo, M.J., Teel, T.L. and Dietsch, A.M. (2016). Implications of human value shift and persistence for biodiversity conservation. Conservation Biology, 30(2), 287-296.	2016	Implications of human value shift and persistence for biodiversity conservation	Conservation Biology	30(2), 287-296	1	3	Global	Not Applicable	Not Applicable	6	Not Applicable	NA	NA	NA	NA	NA	NA	0	0	1	1	10673	survey	0	0	1	0	0	0	1	human values, conservation	0	0	0	0	0	0	NA	1	0	There is evidence possible shift in human values from 'domination' of wildlife to perspective of 'mutualism' with wildlife. That change has many implications for conservation and management of wildlife in urban areas.
68	82	Peter W. Newton	Newton, 2012	Newton, 2012	Newton, P.W. (2012). Liveable and sustainable? Socio-technical challenged for the twenty-first century cities. Journal of Urban Technology, 19(1), 81-102.	2012	Liveable and Sustainable? Socio-Technical Challenges for Twenty-First-Century Cities	Journal of Urban Technology	19(1), 81-102	3	3	Australia from Global Perspective	Not Applicable	Not Applicable	6	Not Applicable	NA	NA	NA	NA	NA	NA	1	0	1	1	NA	Review Paper	1	0	0	1	1	1	1	NA	0	0	0	1	0	0	infrastructure, transport, better resource management	0	0	Implement our recommendations - there are multiple urban technology and urban design pathways capable of significantly winding back the profiles of unsustainable resource consumption that characterize Australia’s built environments.
69	83	Steffen Wetzstein	Wetzstein, 2010	Wetzstein, 2010	Wetzstein, S. (2010). Perceptions of Urban Elites on Four Australasian Cities: How does Perth compare?. Committee for Perth: University of Western Australia, Perth.	2010	Perceptions of Urban Elites on Four Australasian Cities: How does Perth compare?	FACTBase Bulletin - Academic Position Paper	Bulletin 18	2	4	Australia and New Zealand	Southern Australia and Auckland	1. Melbourne 2. Sydney 3. Perth 4. Auckland - Capital Cities Metropolitan Areas	6	Not Applicable	1. 767 2. 1,114 3. 582 4. 327	E. T A. T M. M T. T	1. 1 2. 7 3. 8 4.9	1. 15 2. 10 3. 21 4. 3	1. 2 2. 5 3. 14 4. 12	1. 16 2. 10 3. 21 4. 3	0	0	1	1	43	interviews	0	0	0	1	1	1	1	NA	0	0	0	0	0	0	NA	0	0	in a globalising world people are becoming highly aware of other places. [For that reason there is a need to] convince the rest of the country, region and world that Perth is growing up, acts responsibly and develops sustainably … invest in connecting infrastructure [communications and physical] ... [be] prouder of ... and reinforce Perth's image as a friendly, relaxed, out-door loving and family…
70	84	Jessica R. Sushinsky, Jonathan R . Rhodes , Hugh P. Possingham, Tony K. Gil and Richard A. Fuller	Sushinsky, Rhodes, Possingham, Gill & Fuller, 2012	Sushinsky et al., 2012	Sushinsky, J.R., Rhodes, J.R., Possingham, H.P., Gill, T.K. and Fuller, R.A. (2012). How should we grow cities to minimize their biodiversity impacts? Global Change Biology, 19, 401-410.	2013	How should we grow cities to minimize their biodiversity impacts?	Global Change Biology	19, 401-410	1	1	Australia	Southeast Queensland	Brisbane - Capital City Metropolitan Area	3	Not Specified	441	T	18	36	22	37	1	1	1	1	84 640 houses	NA	0	0	1	1	1	0	1	fauna spices protection	1	0	1	0	1	1	controlled development	1	1	Considerations must be made as to what fauna species are present [in GI and Urban Nature] and which types of development should be considered in order to reduce impact of development on ecological systems.
71	85	Will R Turner, Toshihiko Nakamura and Marco Dinetti	Turner, Nakamura & Dinetti, 2004	Turner et al., 2004	Turner, W.R., Nakamura, T. and Dinetti, M. (2004). Global urbanization and the separation of humans from nature. BioScience, 54(6), 585-590.	2004	Global urbanization and the separation of humans from nature	BioScience	54(6), 585- 590	2	3	Global	Not Applicable	Not Applicable	6	Not Applicable	NA	NA	NA	NA	NA	NA	0	1	1	1	previous data sets analysed	survey	1	1	1	1	1	1	1	NA	1	0	0	0	1	1	NA	0	1	Must continue to plan for and provide nature experience opportunities for all the proven benefits currently known and those not yet articulated. Need to explore the biological interactions between urbanization and biodiversity and investigating means to make urban development more compatible with biodiversity. These efforts need to be redoubled, and they must focus on higher-density developments …
Papers added from supplementary search in May 2018
72	86	Robert Young, Julie Zanders, Katherine Lieberknecht and Elizabeth Fassman-Beck	Young, Zanders, Lieberknecht & Fassman-Beck, 2014	Young et al., 2014	Young, R., Zanders, J., Lieberknecht, K. and Fassman-Beck, E. (2014). A comprehensive typology for mainstreaming urban green infrastructure. Journal of Hydrology, 519, 2571-2583.	2014	A comprehensive typology for mainstreaming urban green infrastructure	Journal of Hydrology	519, 2571–2583	2	2	United States of America and New Zealand	United States of America and New Zealand	1. New York City 2. San Antonio 3. Auckland, NZ	6	Not Specified	1. 767 2. 125 3. 327	T	1. 55 2. NR 3. 9	1. 44 2. NR 3. 3	1. 57 2. NR 3. 12	1. 45 2. NR 3. 3	1	0	1	1	NA	Review Paper	0	0	1	0	0	1	1	ways to progress the use of GI	0	0	0	0	0	0	NA	1	1	Use this new typology to assist in mainstreaming PGI.
73	87	Kimberly M. Jarden, Anne J. Jefferson and Jennifer M. Grieser	Jarden, Jefferson & Grieser, 2016	Jarden et al., 2016	Jarden, K.M., Jefferson, A.J., & Grieser, J.M. (2016). Assessing the effects of catchment‐scale urban green infrastructure retrofits on hydrograph characteristics. Hydrological Processes, 30(10), 1536-1550.	2016	Assessing the effects of catchment-scale urban green infrastructure retrofits on hydrograph characteristics	Hydrological Processes	30(10), 1536–1550	1	2	United States of America	Ohio - Northeast USA	Cleveland - Parma - Capital City Metropolitan Area	2	Four streets in watershed of West Creek	ND	A	40	NR	NR	NR	0	0	1	1	NA	desktop study no participants	0	0	0	0	0	0	1	drainage, water management	0	0	0	0	0	0	NA	0	1	Retrofits to GI can be very valuable in addressing contemporary challenges.
74	88	Alexander Whitehouse	Whitehouse, 2017	Whitehouse, 2017	Whitehouse, A. (2017). Common economic oversights in green infrastructure valuation. Landscape Research, 42(2), 230-234.	2017	Common economic oversights in green infrastructure valuation	Landscape Research	42(2), 230-234	2	3	Global	Not Applicable	Not Applicable	6	Not Applicable	NA	NA	NA	NA	NA	NA	0	0	1	1	NA	Review Paper and Desktop Survey	0	0	0	0	0	1	0	limitations of assessing economic benefit of GI	0	0	0	0	0	0	NA	1	1	Make assessments of GI more robust so that they can expand in mainstream inclusion and application.
75	89	Christopher Ambreya, Jason Byrne, Tony Matthews, Aidan Davison, Chloe Portanger, Alex Loe	Ambreya et al. 2017	Ambreya et al. 2017	Ambrey, C., Byrne, J., Matthews, T., Davison, A., Portanger, C. and Lo, A. (2017). Cultivating climate justice: Green infrastructure and suburban disadvantage in Australia. Applied Geography, 89, 52-60.	2017	Cultivating climate justice: Green infrastructure and suburban disadvantage in Australia	Applied Geography	89, 52–60	3	1	Australia	Southeast Queensland	Upper Coomera, Gold Coast on southern fringe of Brisbane - Regional Centre Metropolitan Area	2	Not Specified	441	T	18	36	22	37	0	0	1	1	30	mail back survey	1	0	1	1	1	1	1	equity planning	0	0	0	0	0	0	NA	1	1	Focus more in equally distributing GI to share benefit equally around populations.
76	90	Gemma Jerome	Jerome, 2017	Jerome, 2017	Jerome, G. (2017). Defining community-scale green infrastructure. Landscape Research, 42(2), 223-229.	2017	Defining community-scale green infrastructure	Landscape Research	42(2), 223-229	2	2	United Kingdom	Northwest England	Liverpool - Regional Centre Metropolitan Area	1	Mersey Forest Community Forest	4930	T	NR	NR	NR	NR	0	0	1	1	NA	NA	0	0	0	0	0	0	1	scale of operations	0	0	0	0	0	0	NA	0	1	Understand and categorise GI sites for the streamlined understanding and utilisation of GI.
77	91	Megan Heckert and Christina D. Rosan	Heckert & Rosan 2016	Heckert & Rosan 2016	Heckert, M. and Rosan, C.D. (2016). Developing a green infrastructure equity index to promote equity planning. Urban Forestry & Urban Greening, 19, 263-270.	2016	Developing a green infrastructure equity index to promote equity planning	Urban Forestry & Urban Greening	19, 263–270	3	2	United States of America	Northeast USA	Philadelphia	3	Not Specified	4505	T	NR	NR	NR	50	1	0	1	1	NA	Review Paper and Desktop Survey	1	0	0	1	0	1	1	Water management	0	0	0	0	0	0	NA	1	1	Focus more in equally distributing GI to share benefit equally among populations - proposed use of the Green Infrastructure Equity Index.
78	92	Konstantina-Dimitra Salata and Athena Yiannakou	Salata & Yiannakou, 2016	Salata & Yiannakou, 2016	Salata K. and Yiannakou A. (2016). Green Infrastructure and climate change adaptation. TeMA: Journal of Land Use, Mobility and Environment, 9 (1), 7-24.	2016	Green Infrastructure and climate change adaptation	TeMA: Journal of Land Use, Mobility and Environment	9(1), 7-24	3	2	Greece	Central Aegean Coast	Thessaloniki - Kalamaria Area - Regional City Metropolitan Area	2	Not Specified	16331	M	NR	NR	NR	NR	1	1	1	1	NA	Review Paper and Desktop Survey	1	0	1	1	0	1	1	Extreme weather events, climate change	0	0	0	0	0	0	NA	1	1	Consider GI more to help combat effects of climate change.
79	93	Mick Lennon	Lennon, 2015	Lennon, 2015	Lennon, M. (2015). Green infrastructure and planning policy: A critical assessment. Local Environment, 20(8), 957-980.	2015	Green infrastructure and planning policy: A critical assessment	Local Environment	20(8), 957-980	3	2	Republic of Ireland	North Dublin Region	County Fingal - Northern Fringe Capital City Metropolitan Area	3	Not Specified	4588	T	42	34	41	34	0	0	0	0	NA	Review Paper and Desktop Survey	0	0	0	1	0	0	0	NA	0	0	0	0	0	0	NA	1	1	Consider these findings for future planning of GI.
80	94	Marthe L. Derkzen, Astrid J.A. van Teeffelen and Peter H. Verburg	Derkzen, van Teeffelen & Verburg, 2017	Derkzen et al., 2017	Derkzen, M.L., van Teeffelen, A.J. and Verburg, P H. (2017). Green infrastructure for urban climate adaptation: How do residents’ views on climate impacts and green infrastructure shape adaptation preferences?. Landscape and Urban Planning, 157, 106-130.	2017	Green infrastructure for urban climate adaptation: How do residents’ views on climate impacts and green infrastructure shape adaptation preferences?	Landscape and Urban Planning	157, 106–130	1	2	Netherlands	Central West	Rotterdam - Major City Metropolitan Area	3	Not Specified	2987	T	NR	NR	NR	NR	0	1	1	1	0	face to face survey	0	0	0	0	0	0	1	Community perception and performance of GI options	0	0	1	0	0	0	NA	1	1	Work to understand the perceptions of the community for different GI installations as this has further implications in terms of things such as support/acceptance.
81	95	Christopher Coutts and Micah Hahn	Coutts & Hahn, 2015	Coutts & Hahn, 2015	Coutts, C., and Hahn, M. (2015). Green Infrastructure, Ecosystem Services, and Human Health. International Journal of Environmental Research and Public Health, 12(8), 9768-9798.	2015	Green Infrastructure, Ecosystem Services, and Human Health	International Journal of Environmental Research and Public Health	12(8), 9768-9798	2	3	Global	Not Applicable	Not Applicable	6	Not Applicable	NA	NA	NA	NA	NA	NA	0	0	1	1	NA	Review	1	0	1	0	1	1	1	existing models used to describe PGI contributions	0	0	0	0	0	0	NA	1	1	Further research into the health benefits derived from green infrastructure is required.
82	96	Jost Wilker, Karsten Rusche and Christine Rymsa-Fitschen	Wilker, Rusche & Rymsa-Fitschen, 2016	Wilker et al., 2016	Wilker, J., Rusche, K., & Rymsa-Fitschen, C. (2016). Improving participation in green infrastructure planning. Planning Practice & Research, 31(3), 229-249.	2016	Improving Participation in Green Infrastructure Planning	Planning Practice & Research	31(3), 229–249	3	2	1. Belgium 2. Germany 3. Netherlands 4. United Kingdom	Western Europe	1. Bruges & Liège 2. Stuttgart 3. Amersfoort 4. Manchester & Sheffield	4	Not Specified	850 2,804 3,013 2,386 11,451 1,408	T	5 x NR	2. 21	5 x NR	2. 28	1	0	1	1	NA	Review	0	0	1	1	0	1	1	NA	0	0	0	0	0	0	NA	1	1	More community engagement and public participation often leads to greater success and satisfaction with GI Projects.
83	97	Tom L. Green, Jakub Kronenberg, Erik Andersson, Thomas Elmqvis and Erik Gómez-Baggethun	Green, Kronenberg, Andersson, Elmqvis & Gómez-Baggethun, 2006	Green et al., 2006	Green, T.L., Kronenberg, J., Andersson, E., Elmqvist, T., and Gómez-Baggethun, E. (2016). Insurance value of green infrastructure in and around cities. Ecosystems, 19(6), 1051-1063.	2006	Insurance Value of Green Infrastructure in and Around Cities	Ecosystems	19(6), 1051–1063	2	3	Global with case studies from Canada and United Kingdom	Not Applicable	Not Applicable	6	For Case studies, peri-urban watersheds (Vancouver) and private urban green infrastructure (London)	NA	NA	NA	NA	NA	NA	0	0	1	1	NA	Review Paper with Case Study	0	0	0	0	0	1	0	NA	0	0	0	0	0	0	NA	0	0	When making decisions on GI, important to not merely recognize the services provided by urban ecosystems, but also the consequences of plausible change/degradation by making the necessary investments to secure the long-term capacity of urban ecosystems to provide ecosystem services in the face of disturbance, change and management error.
84	98	Briony A. Norton, Andrew M. Coutts, Stephen J. Livesley, Richard J. Harris, Annie M. Hunter and Nicholas S.G. Williams	Norton et al., 2015	Norton et al., 2015	Norton, B.A., Coutts, A.M., Livesley, S.J., Harris, R.J., Hunter, A.M., and Williams, N.S. (2015). Planning for cooler cities: A framework to prioritise green infrastructure to mitigate high temperatures in urban landscapes. Landscape and Urban Planning, 134, 127-138.	2015	Planning for cooler cities: A framework to prioritise green infrastructure to mitigate high temperatures in urban landscapes	Landscape and Urban Planning	134, 127–138	3	1	Australia	Central Southern Victoria	Melbourne - Richmond and Clayton - Capital City Metropolitan Area	2	Not Specified	767	T	1	15	2	16	1	1	1	1	NA	Review Paper, Desktop Survey & Mathematical Analysis	0	1	1	1	0	1	1	NA	0	0	0	0	0	0	NA	0	0	Advocating use of GI to mitigate climate change and other urban climate challenges.
85	99	Maria Raquel Catalano de Sousa, Franco Andre Montalto and Matthew I. Palmer	De Sousa, Montalto & Palmer, 2016	De Sousa et al., 2016	Raquel, C.D.S.M., Montalto, F.A. and Palmer, M.I. (2016). Potential climate change impacts on green infrastructure vegetation. Urban Forestry & Urban Greening, 20, 128-139.	2016	Potential climate change impacts on green infrastructure vegetation	Urban Forestry & Urban Greening	20, 128–139	1	2	United States of America	Focused towards Urban Northeast USA	Not Specified	5	Greenhouse study with broad application for findings	NA	T	NA	NA	NA	NA	0	0	0	1	NA	plant experiment	0	0	0	0	0	0	0	Species suitability testing for GI	0	0	0	0	0	0	NA	0	0	Increase knowledge in GI species use to ensure productivity and usefulness.
86	100	Erik Andersson, Stephan Barthel, Sara Borgström, Johan Colding, Thomas Elmqvist, Carl Folke and Åsa Gren	Andersson et al., 2014	Andersson et al., 2014	Andersson, E., Barthel, S., Borgström, S., Colding, J., Elmqvist, T., Folke, C. and Gren, Å. (2014). Reconnecting Cities to the Biosphere: Stewardship of Green Infrastructure and Urban Ecosystem Services. Ambio, 43(4), 445-453.	2014	Reconnecting Cities to the Biosphere: Stewardship of Green Infrastructure and Urban Ecosystem Services	Ambio	43:445–453	2	2	Global with case study from Sweden	Not Applicable	Global with case study for Stockholm	6	Not Applicable	NA	NA	NA	NA	NA	NA	0	0	0	0	NA	Review Paper	1	0	1	0	0	1	1	NA	0	0	0	0	0	0	NA	0	0	Several recommendations to both reduce ecological footprint of cities and change character of footprint, while providing opportunities for responsible stewardship to reconnect citizens to the biosphere.
87	101	Noelwah R. Netusil, Zachary Levin, Vivek Shandas, Ted Hart	Netusil, Levin, Shandas & Hart, 2014	Netusil et al., 2014	Netusil, N. R., Levin, Z., Shandas, V. and Hart, T. (2014). Valuing green infrastructure in Portland, Oregon. Landscape and Urban Planning, 124, 14-21.	2014	Valuing green infrastructure in Portland, Oregon	Landscape and Urban Planning	124, 14–21	1	2	USA	Oregon	Portland - Capital City Metropolitan Area	3	Not Specified	1850	T	NR	NR	NR	NR	0	1	1	1	NA	analytical/ mathematical	0	0	0	0	0	1	1	financial/valuation	0	0	0	0	0	0	NA	1	1	UGI can provide cost-effective and publicly acceptable approaches to reduce the risk of flooding and other stormwater impacts in extreme weather events.
